# Supplementary material
Source: PubMed Central journal article supplement (PMC7159328)
Supplement: ADHM-5-167-s001.pdf [file ADHM-5-167-s001.pdf]

**ADVANCED  
HEALTHCARE  
MATERIALS**

Supporting Information

for *Adv. Healthcare Mater.*, DOI: 10.1002/adhm.201500708

Rapid Optical Cavity PCR

*Jun Ho Son, SoonGweon Hong, Amanda J. Haack, Lars Gustafson, Minsun Song, Ori Hoxha, and Luke P. Lee\**

## Supporting Information

## Optical Cavity PCR

*Jun Ho Son<sup>1,2</sup>, SoonGweon Hong<sup>1,2</sup>, Amanda J. Haack<sup>1</sup>, Lars Gustafson<sup>1</sup>, Minsun Song<sup>1,2</sup>, Ori Hoxha<sup>1</sup>, and Luke P. Lee<sup>1,2,3,4\*</sup>*

<sup>1</sup>Department of Bioengineering, <sup>2</sup>Berkeley Sensor and Actuator Center, <sup>3</sup>Department of Electrical Engineering and Computer Sciences, <sup>4</sup>Biophysics Graduate Program, University of California, Berkeley, CA 94720, USA.

\*Corresponding author, E-mail: [lplee@berkeley.edu](mailto:lplee@berkeley.edu)

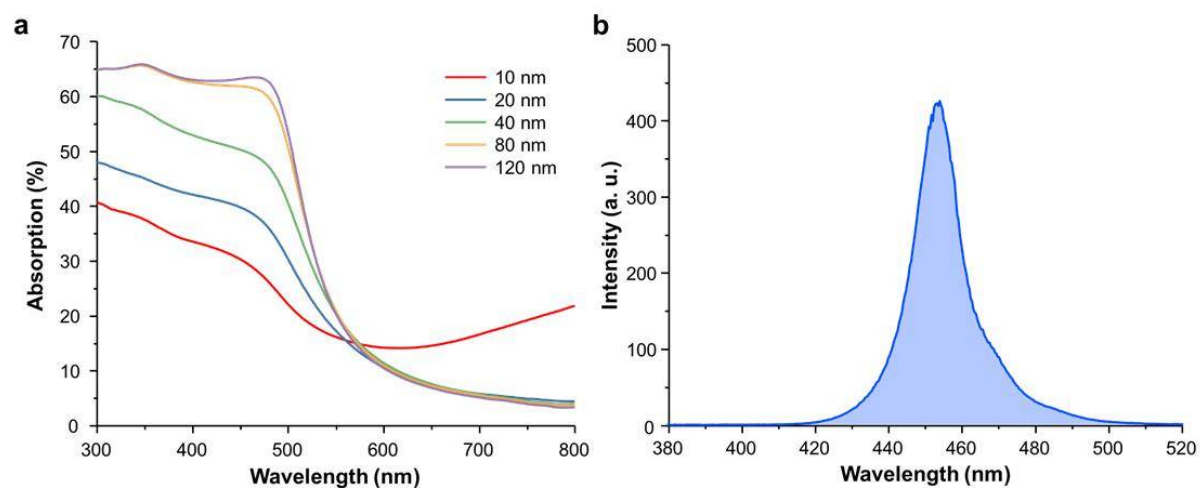

**Figure S1.** a, Absorption spectra of the thin Au films with different thicknesses. b, Emission spectrum of blue LEDs used for photothermal heating of the thin Au film.

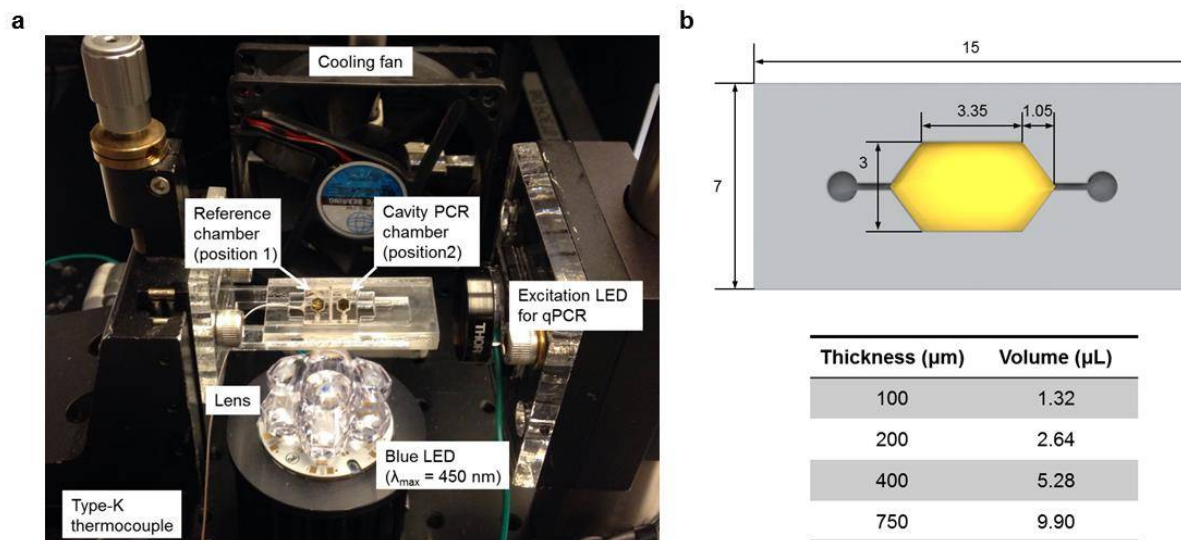

**Figure S2.** a, Photograph of the experimental setup for the LED-driven optical cavity PCR. Injection current is 1 A. b, Dimensions of the cavity PCR chamber (in mm) with different thicknesses for different volumes of PCR mixture, ranging from 1.32  $\mu\text{L}$  to 9.90  $\mu\text{L}$ .

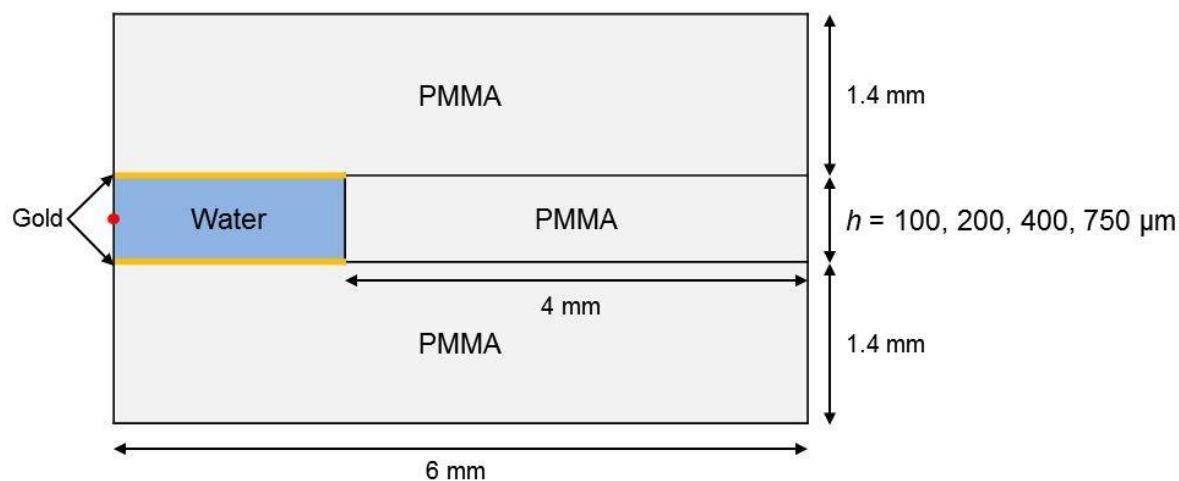

**Figure S3.** Geometry for the simulation of temperature distribution in the optical cavity PCR chamber. The thickness of the chamber varied from 100 to 750  $\mu\text{m}$ . The temperature was monitored at the middle of the chamber (red dot, 0  $\mu\text{m}$  on x-axis and  $h/2 \mu\text{m}$  on z-axis for each thickness).

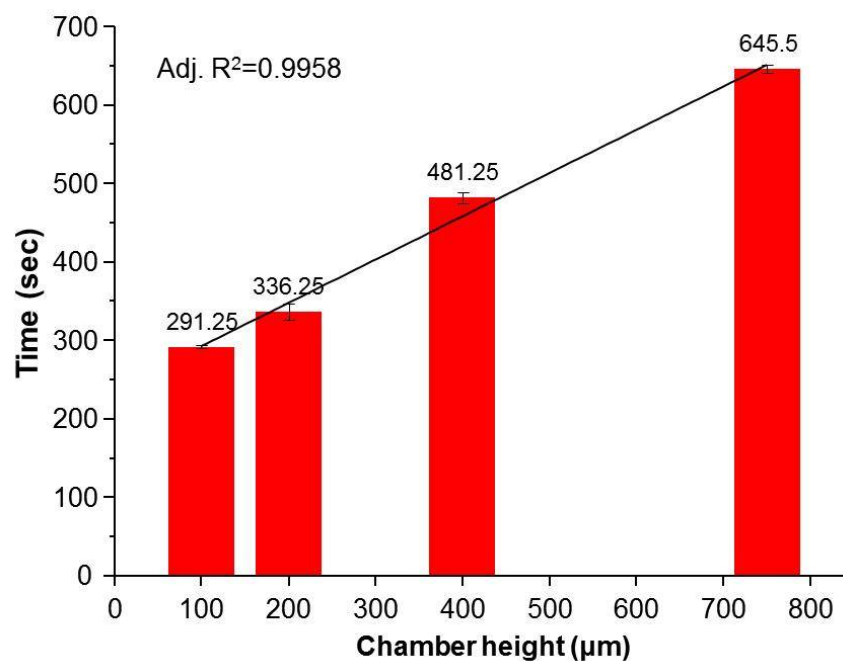

**Figure S4.** Time for 30 PCR thermal cycles obtained from bottom-only heating with different chamber heights.

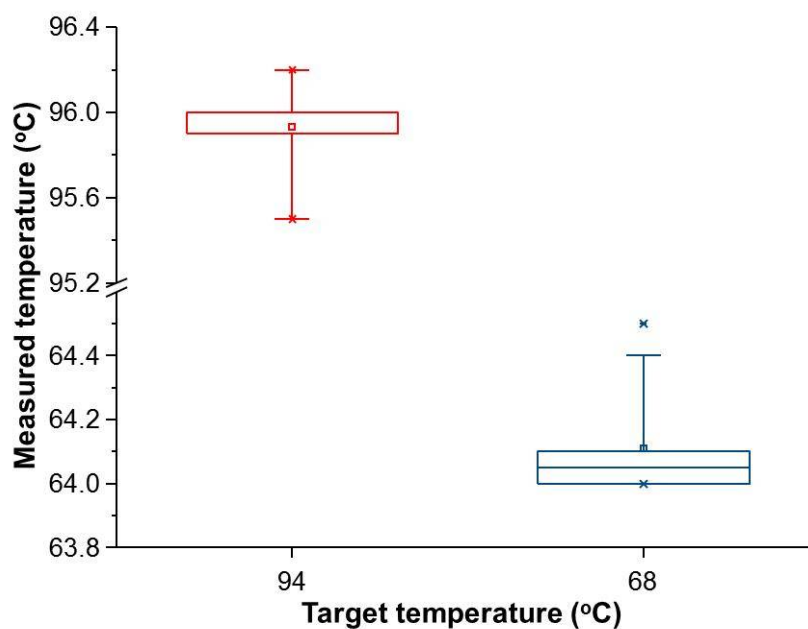

**Figure S5.** Comparison between target and measured temperatures (sample temperature on the display) from the benchtop thermal cycler. Thermal cycling conditions: 1 sec at 94  $^{\circ}\text{C}$ , 1 sec at 68  $^{\circ}\text{C}$ , 30 cycles. Total reaction time: 15 min 40 sec.

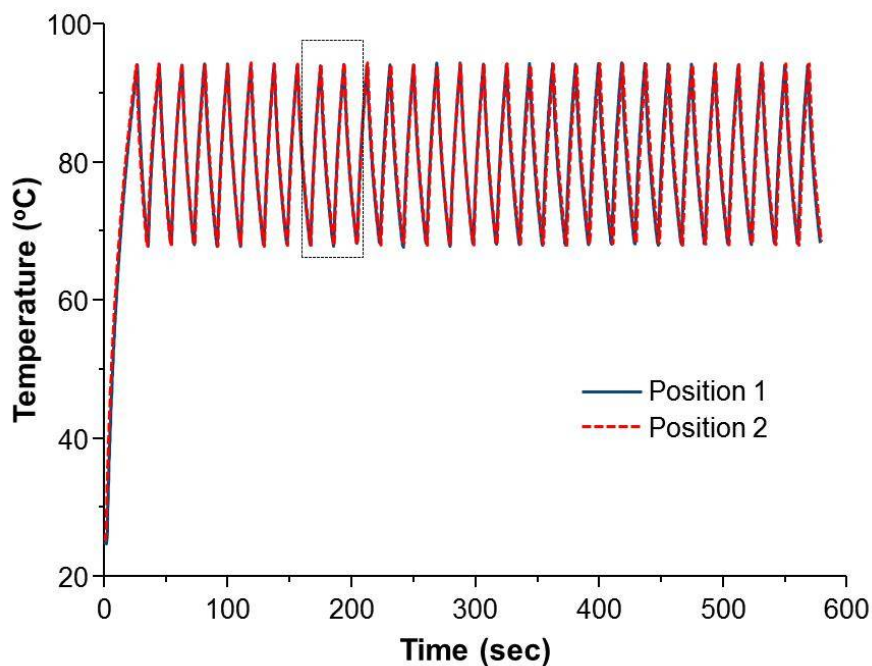

**Figure S6.** Temperature profiles for the 30 thermal cycles of the cavity PCR chamber at positions 1 and 2. Fig. 3e shows the enlarged rectangle region.

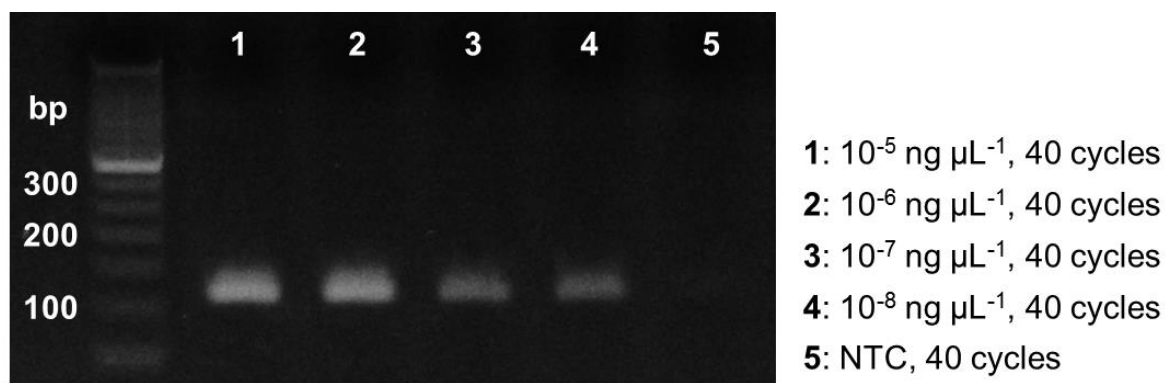

**Figure S7.** Results of 2% agarose gel from the benchtop PCR demonstrating the trend in band intensity with different concentrations of initial c-MET cDNA. A thermal cycling protocol recommended by the manufacturer was used: initial denaturation was at 95 °C for 3 min, 40 cycles for 15 sec at 95 °C (denaturation), 15 sec at 60 °C (annealing), and 1 sec at 72 °C (extension), final extension at 72 °C for 6 sec.

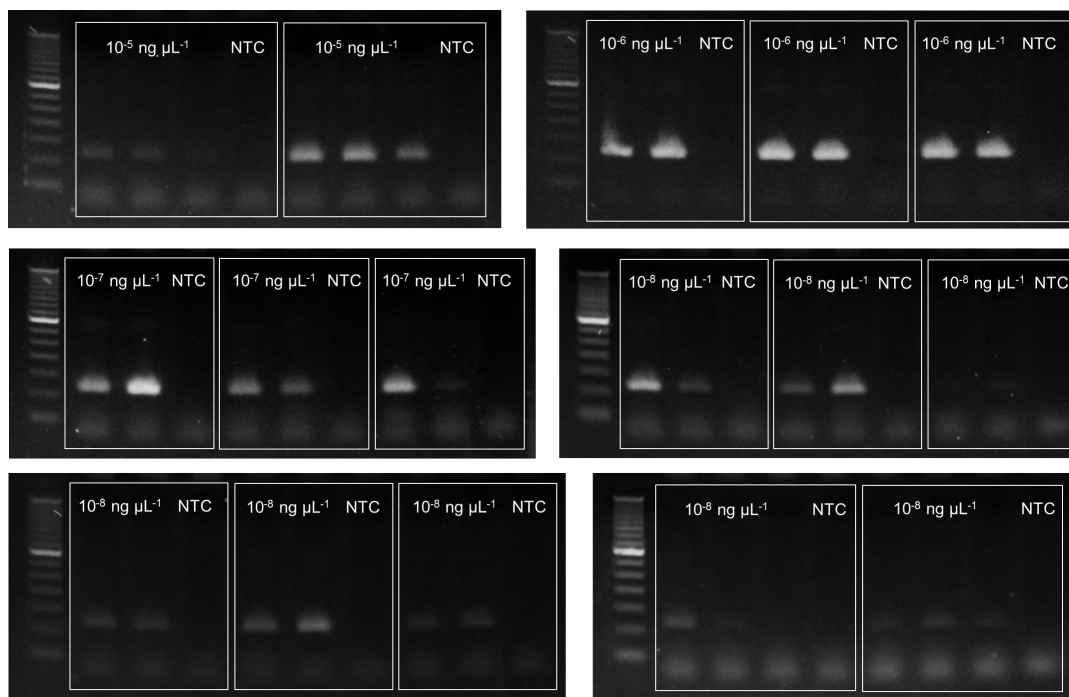

**Figure S8.** Images of 2% agarose gel with different concentrations of initial c-MET cDNA ranging from  $10^{-5}$  ng  $\mu\text{L}^{-1}$  to  $10^{-8}$  ng  $\mu\text{L}^{-1}$  for the calculation of the PCR success rate (Figure 4f) to show the repeatability and reproducibility of cavity PCR.

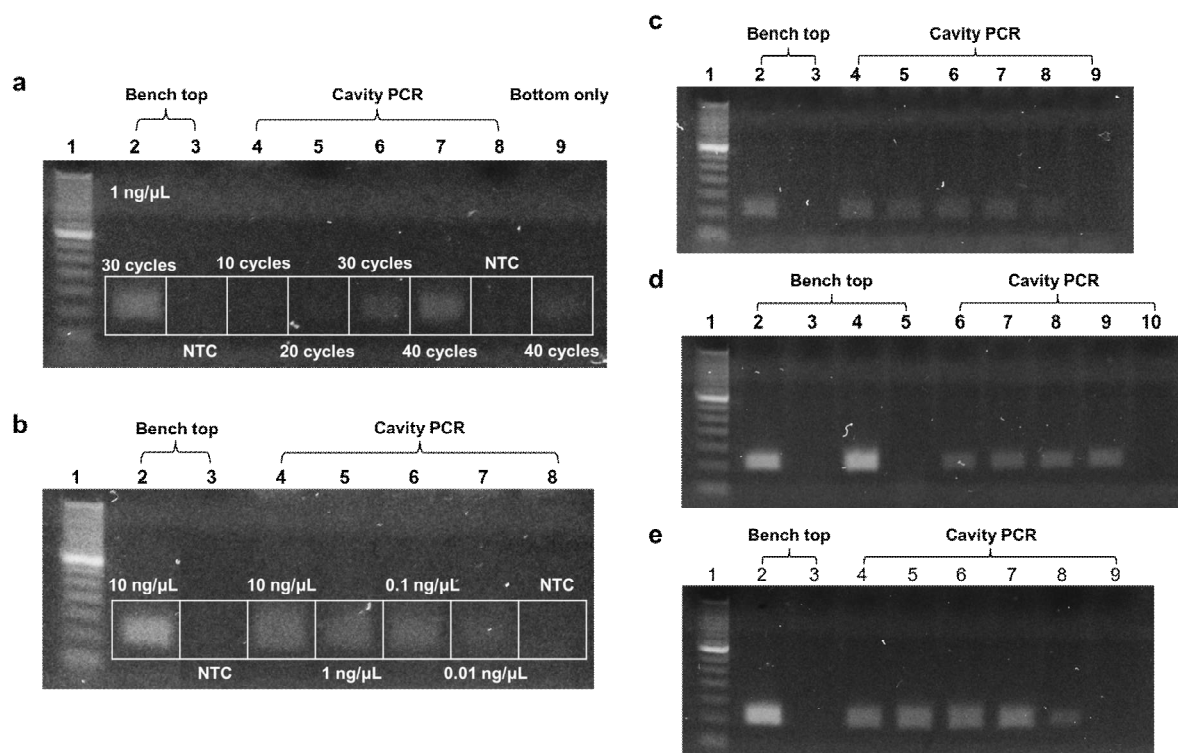

**Figure S9.** a, Results of 2% agarose gel demonstrating a clear trend of increased PCR product

with increased thermal cycling number. Amplification in the cavity PCR shows a higher band intensity than in the bottom-only heating PCR for 40 cycles, indicating better amplification efficiency of the cavity PCR due to enhanced temperature uniformity. b, Results of 2% agarose gel demonstrating a trend in band intensity with increasing initial  $\lambda$ -DNA concentration. c, d, e, Results of 2% agarose gel demonstrating the repeatability and reproducibility of the optical cavity PCR when performed by three minimally trained undergraduate students.

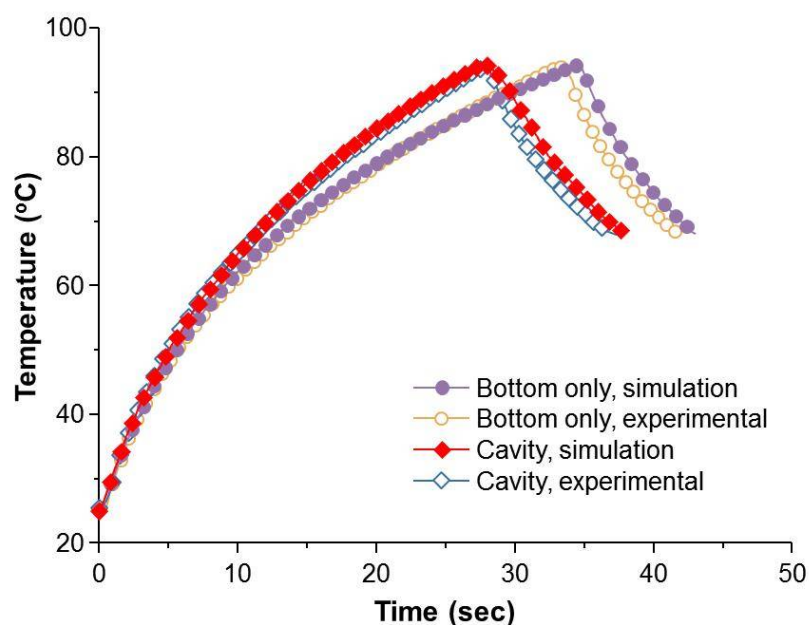

**Figure S10.** Comparison of temperature profiles between simulation and experimental results during the first heating and cooling cycles. The chamber height is 750  $\mu\text{m}$ .

**Table S1.** Averaged transmittance (T), reflectance (R) and absorbance (A) of the thin Au film over the emission wavelengths of LEDs with different thicknesses. Absorbance (%) = 100 – Transmittance (%) – Reflectance (%).

| <b>Au thickness</b> | <b>T (%)</b> | <b>R (%)</b> | <b>A (%)</b> |
|---------------------|--------------|--------------|--------------|
| 10 nm               | 50.6         | 19.7         | 29.7         |
| 20 nm               | 29.6         | 31.2         | 39.2         |
| 40 nm               | 10.6         | 39.6         | 49.8         |
| 80 nm               | 1.1          | 37.4         | 61.5         |
| 120 nm              | 0.1          | 36.8         | 63.1         |

**Table S2.** Material parameters for the heat transfer simulation.

|       | <b>Density</b><br>$\rho$ (kg m <sup>-3</sup> ) | <b>Heat capacity</b><br>C (J kg <sup>-1</sup> K <sup>-1</sup> ) | <b>Thermal conductivity</b><br>k (W m <sup>-1</sup> K <sup>-1</sup> ) |
|-------|------------------------------------------------|-----------------------------------------------------------------|-----------------------------------------------------------------------|
| Gold  | 19,300                                         | 129                                                             | 317                                                                   |
| PMMA  | 1,190                                          | 1,420                                                           | 0.19                                                                  |
| Water | 998                                            | 4,180                                                           | 0.6                                                                   |
